# Supplementary material
Source: publisher figshare collection journal article supplement (https://brill.figshare.com/articles/dataset/_/10028777)
Supplement: Supplementary file 1 [file 1]

**Unraveling the puzzle of *Liogenys* biodiversity: fifteen new  
species, nomenclatural acts and new geographical records  
(Coleoptera: Scarabaeidae)**

**Mariana A. Cherman\***, Daniel S. Basílio, Kleber M. Mise and Lúcia M. Almeida

Laboratório de Sistemática e Bioecologia de Coleoptera, Departamento de Zoologia,  
Universidade Federal do Paraná, Caixa Postal 19020, 81531–980, Curitiba, Paraná, Brazil

\*Corresponding author, e-mail: [marianabioar@gmail.com](mailto:marianabioar@gmail.com)

**Supplementary material**

**Supplementary Text S1**
