# Supplementary material
Source: publisher figshare collection journal article supplement (https://brill.figshare.com/articles/dataset/_/10028777)
Supplement: Supplementary file 2 [file 1]

## GENERAL

Added new species herein published (with all characters)

Updated ecoregions of *L. parva*, removing “?” and substituted to cerrado and amazonian forest.

Updated ecoregions of *L. acutidens*, *L. parva*, *L. moseri*, *L. piauienses*, *L. sinuaticeps*, *L. tibialis* (Cherman 2018).

*L. femella* was excluded, as it was synonymized with *L. parva*. Consequently the distribution of *L. parva* was increased.

*L. unicolor*:

- Changed (clypeus anterior margin: clearly emarginate, in general forming two teeth-like angles) to “not or barely emarginated” after re-examination.

- Changed (body shape: elongate). After re-examination it is also rarely considered “short”, so it received a rare score for this state.

Added distribution maps for all species

Changed names of species previously complemented with sp. nov. to the authors name

## HEAD

Added figure on the character state (concavity of distal palpomere of maxillary palp: fovea extending up to the midline of the palpomere)

Added arrow indicating (labium carina: present)

Changed states' names of the character (clypeus: emargination shape). They became respectively “angled [clearly discontinuous line]”, “sub-angled [apparently angled, but with a continuous line at a closer view]”, “rounded [clearly continuous line]”.

Changed states' name of the character (clypeus, anterior margin: not or barely emarginated, if so, sub-lobed) renamed to “not or barely emarginated”.

## THORAX

Changed photo of (maximum width of pronotum: equal or wider than basal width of pronotum)

Added photo of (pronotum color: blackish)

Indicated with a dashed line (subapical callus of elytron)

Added photo of (distance between meso- and meta coxa: equal to the length of metacoxa)

Added photo of (pro tibiae: outer margin) on both states

Added photo of (metafemur; medially projected in males: absent"

Changed name of character state to (hind tibia; inner margin in males: straight)

Changed photos of (metacoxa basal apophysis: produced/not produced)

## ABDOMEN

Added photos of (ventrite (II, III, IV e V) produced in males: abset)

Added arrows indicating structures' names in (pygidium; shape in lateral view)

Added photo of (pygidium; basal width)
